1 **Phylogenomics of expanding uncultured environmental Tenericutes**  
2 **provides insights into their pathogenicity and evolutionary**  
3 **relationship with Bacilli**

4 Yong Wang<sup>1,\*</sup>, Jiao-Mei Huang<sup>1,2</sup>, Ying-Li Zhou<sup>1,2</sup>, Alexandre Almeida<sup>3,4</sup>, Robert D.  
5 Finn<sup>3</sup>, Antoine Danchin<sup>5,6</sup>, Li-Sheng He<sup>1</sup>

6 <sup>1</sup>Institute of Deep Sea Science and Engineering, Chinese Academy of Sciences, Sanya,  
7 Hai Nan, China

8 <sup>2</sup> University of Chinese Academy of Sciences, Beijing, China

9 <sup>3</sup>European Molecular Biology Laboratory, European Bioinformatics Institute  
10 (EMBL-EBI), Wellcome Genome Campus, Hinxton, UK

11 <sup>4</sup>Wellcome Sanger Institute, Wellcome Genome Campus, Hinxton, UK.

12 <sup>5</sup>Department of Infection, Immunity and Inflammation, Institut Cochin INSERM  
13 U1016 - CNRS UMR8104 - Université Paris Descartes, 24 rue du Faubourg  
14 Saint-Jacques, 75014 Paris, France

15 <sup>6</sup>School of Biomedical Sciences, Li Kashing Faculty of Medicine, University of Hong  
16 Kong, 21 Sassoon Road, SAR Hong Kong, China

17

18 **\* Corresponding author:**

19 Yong Wang, PhD

20 Institute of Deep Sea Science and Engineering, Chinese Academy of Sciences

21 No. 28, Luhuitou Road, Sanya, Hai Nan, P.R. of China

22 **Phone:** 086-898-88381062

23 **E-mail:** wangy@idsse.ac.cn

24 **Running title:** *Genomics of environmental Tenericutes*

25 **Keywords:** Bacilli; autotrophy; pathogen; gut microbiome; environmental

26 Tenericutes

## 27 **ABSTRACT**

28 The metabolic capacity, stress response and evolution of uncultured environmental  
29 Tenericutes have remained elusive, since previous studies have been largely focused on  
30 pathogenic species. In this study, we expanded analyses on Tenericutes lineages that  
31 inhabit various environments using a collection of 840 genomes. Several novel  
32 environmental lineages were discovered inhabiting the human gut, ground water,  
33 bioreactors and hypersaline lake and spanning the Haloplasmales and  
34 Mycoplasmales orders. A phylogenomics analysis of Bacilli and Tenericutes  
35 genomes revealed that some uncultured Tenericutes are affiliated with novel clades in  
36 Bacilli, such as RF39, RFN20 and ML615. Erysipelotrichales and two major gut  
37 lineages, RF39 and RFN20, were found to be neighboring clades of Mycoplasmales.  
38 We detected habitat-specific functional patterns between the pathogenic, gut and the  
39 environmental Tenericutes, where genes involved in carbohydrate storage, carbon  
40 fixation, mutation repair, environmental response and amino acid cleavage are  
41 overrepresented in the genomes of environmental lineages. We hypothesize that the two  
42 major gut lineages, namely RF39 and RFN20, are probably acetate and hydrogen  
43 producers. Furthermore, deteriorating capacity of bactoprenol synthesis for cell wall  
44 peptidoglycan precursors secretion is a potential adaptive strategy employed by these  
45 lineages in response to the gut environment. This study uncovers the characteristic  
46 functions of environmental Tenericutes and their relationships with Bacilli, which  
47 sheds new light onto the pathogenicity and evolutionary processes of  
48 Mycoplasmales.

## 49 **IMPORTANCE**

50 Environmental Tenericutes bacteria were recently discovered in numerous  
51 environments. However, our current collection of Tenericutes genomes was  
52 overrepresented by those for pathogens. Our phylogenomics study displays the  
53 relationships between all the available Tenericutes, as well as those between  
54 Tenericutes and the clades in Bacilli, which casts lights into the uncertain boundary  
55 between the environmental lineages of Tenericutes and Bacilli. By comparing the

56 genomes of the environmental and pathogenic Tenericutes, we revealed the metabolic  
57 pathways and adaptive strategies of the Tenericutes in the different environments and  
58 hosts. We also predicted the metabolism of the two major gut lineages RF39 and  
59 RFN20 of Tenericutes, indicating their potential importance in stabilization of the gut  
60 microbiome and contribution to human health.

61

## 62 INTRODUCTION

63 The phylum Tenericutes is composed of bacteria lacking a peptidoglycan cell wall.  
64 The most well-studied clade belonging to this phylum is Mollicutes, which contains  
65 medically relevant genera, including *Mycoplasma*, *Ureaplasma* and *Acholeplasma*.  
66 All reported mollicutes are commensals or obligate parasites of humans, domestic  
67 animals, plants and insects (1). Most studies so far have focused on pathogenic strains  
68 in the Mycoplasmatales order (which encompasses the genera such as *Mycoplasma*,  
69 *Ureaplasma*, *Mesoplasma* and *Spiroplasma*), resulting in their overrepresentation in  
70 current genome databases. However, Tenericutes can also be found across a wide and  
71 diverse range of environments. Recently, free-living *Izemoplasma* and *Haloplasma*  
72 were reported in a deep-sea cold seep and brine pool, respectively (2, 3). Based on  
73 their genomic features, the cell wall-lacking *Izemoplasma* were predicted to be  
74 hydrogen producers and DNA degraders. The *Haloplasma contractile* genome  
75 encodes actin and tubulin homologues, which might be required for its specific  
76 motility in deep-sea hypersaline lake (4). These marine environmental Tenericutes  
77 exhibit metabolic versatility and adaptive flexibility. This points out the unwanted  
78 limitation that we must take into account at present when working on isolates of  
79 marine Tenericutes representatives. The paucity of marine isolates currently available  
80 has limited further mechanistic insights.

81

82 Environmental Tenericutes might be pathogens and/or mutualistic symbionts in the  
83 gut of their host species. For example, mycoplasmas and hepatoplasmas affiliated  
84 with Mycoplasmatales play a role in degrading recalcitrant carbon sources in the  
85 stomach and pancreas of isopods (5, 6). *Spiroplasma* symbionts discovered in sea

86 cucumber guts possibly protect the host intestine from invading viruses (7).  
87 Tenericutes were also found in the intestinal tract of healthy shallow-water fish,  
88 mussels and 305 insect specimens (8-10). Recently, over 100 uncultured Tenericutes  
89 displaying high phylogenetic diversity were discovered in human gut metagenomes  
90 (11), irrespective of age and health status. It remains to be determined whether these  
91 novel lineages found in the human gut are linked to the maintenance of gut  
92 homeostasis and microbiome function. As a consequence of the host cell-associated  
93 lifestyle, the Tenericutes bacteria show extreme reduction in their genomes as well as  
94 reduced metabolic capacities, eliminating genes related to regulatory elements,  
95 biosynthesis of amino acids and intermediate metabolic compounds that must be  
96 imported from the host cytoplasm or tissue (12). Beyond genome reduction, evolution  
97 of pathogenic Mycoplasmatales species has also been accompanied by acquisition of  
98 new core metabolic and virulence factors (13, 14). Therefore, a comparison of the  
99 genetic profiles between environmental lineages and pathogens is needed to obtain  
100 insights into the adaptation of beneficial symbionts and the emergence of new  
101 diseases.

102

103 Since Tenericutes were recently reclassified into a Bacilli clade of Firmicutes (15), the  
104 discovery of environmental Tenericutes renovates the question regarding the boundary  
105 between Tenericutes and other clades of Bacilli. RF39 and RFN20 are two novel  
106 lineages of Bacilli, reported in the gut of the humans and domestic animals (16, 17).  
107 The environmental lineages of Bacilli and Tenericutes are expected to consist in close  
108 relatives but their genetic relationship has not been studied. This is important to  
109 address, as uncultured environmental Tenericutes and Bacilli may potentially emerge  
110 as pathogens. In this study, we compiled the genomes of 840 Tenericutes and  
111 determined their phylogenomic relationships with Bacilli. By analyzing the functional  
112 capacity encoded in these genomes, we deciphered the major differences in metabolic  
113 spectra and adaptive strategies between the major lineages of Tenericutes, including  
114 the two dominant gut lineages RF39 and RFN20.

115

116

## 117 **RESULTS AND DISCUSSION**

### 118 **Phylogenetic tree of 16S rRNA genes and phylogenomics of Tenericutes**

119 We retrieved all available Tenericutes genomes from the NCBI database (April, 2019).  
120 A total of 840 genomes with  $\geq 50\%$  completeness and  $\leq 10\%$  contamination by foreign  
121 DNA were selected (Supplementary file 1). From these, 685 16S rRNA genes were  
122 extracted and clustered together when displaying at  $>99\%$  identity, resulting in 227  
123 representative sequences. Approximately 70% of the non-redundant sequences were  
124 derived from the order Mycoplasmatales (highly represented by the hominis group),  
125 which was largely composed of pathogens isolated from plants, humans and animals.  
126 Together with 33 reference sequences from marine samples, a total of 260 16S rRNA  
127 genes were used to build a maximum-likelihood (ML) tree. Using *Bacillus subtilis* as  
128 an outgroup, Tenericutes 16S rRNA sequences were divided into several clades (Fig.  
129 1A). *Acholeplasma* and *Phytoplasma* were grouped into one clade, while  
130 *Izemoplasma* and *Haloplasma* were closer to the basal group. Tenericutes species  
131 were detected across a range of environments, including mud, bioreactors, hypersaline  
132 lake sediment, and ground water. The non-human hosts of Tenericutes included  
133 marine animals, domestic animals and fungi. Sequences isolated from fungi and  
134 mycoplasma-infected animal blood samples were associated with longer branches,  
135 indicating the occurrence of a niche-specific evolution. *Hepatoplasma* identified as a  
136 novel genus in Mycoplasmatales is also exclusively present in the gut microbiome of  
137 amphipods and isopods (5, 18). *Spiroplasma* detected in a sea cucumber gut has been  
138 described as a mutualistic endosymbiont (7), rather than a pathogen. These isolates  
139 from environmental hosts were distantly related to others in the tree, indicating a high  
140 diversity of Mycoplasmatales across a wide range of hosts and their essential role in  
141 adaptation and health of marine invertebrates. Analyses of 135 16S rRNA amplicon  
142 datasets and 141 Tara Ocean metagenomes (19) from marine waters revealed the  
143 presence of mycoplasmas from the hominis group and other sequences from the basal  
144 groups of the tree in more than 21.7% of the samples. Four of the five representative  
145 16S rRNA sequences from the hominis group were similar (95.9%-99.3%) to that of

146 halophilic *Mycoplasma todarodis* isolated from squids collected near an Atlantic  
147 island. The finding of the Tenericutes isolated from humans and other animal hosts in  
148 the marine samples indicates that they may be spreading possibly through sewage.  
149 The relative abundance of the twelve representative 16S rRNA genes from the marine  
150 waters was extremely low (<0.1%) in the microbial communities of the oceans.  
151 However, considering the tremendous body of marine water, the oceans harbor a  
152 massive Tenericutes population composed of undetected novel lineages. We detected  
153 two major clades of human gut lineages (hereafter referred to as HG1 and HG2) that  
154 were placed between Mycoplasmatales and Acholeplasmatales (Fig. 1A). These two  
155 lineages have been revealed recently as encompassing many previously unknown  
156 species in the human gut (11). However, their contribution to human health and the  
157 core gut microbiome stability remains unclear.

158

159 A phylogenomics analysis of Tenericutes was performed using concatenated  
160 conserved proteins from 840 Tenericutes genomes and three Firmicutes genomes.  
161 Interestingly, the topology of the phylogenomic tree coincides with that of the  
162 phylogenetic tree based on 16S rRNA genes. However, 67.6% of the genomes were  
163 derived from Mycoplasmatales, indicating a strong bias of Tenericutes genomes  
164 towards pathogens and disease-inducing isolates. The human gut lineages HG1 ( $n=87$ )  
165 and HG2 ( $n=21$ ) were found to be neighboring clades of Mycoplasmatales as well  
166 (Fig. 1B). The genetic distance between the genomes of the gut lineages was much  
167 higher than that between the species in Mycoplasmatales, except for those in  
168 mycoplasma-infected blood and fungi. *Acholeplasma* and *Phytolasma* were within a  
169 clade composed of uncultured environmental Tenericutes lineages from ground waters,  
170 hypersaline sediments and mud, suggesting an environmental origin for the two  
171 genera.

172

173 By calculating the relative evolutionary divergence (RED) of the genomes of several  
174 Tenericutes lineages (15), the average RED values for HG1 and HG2 were  $0.94 \pm 0.03$   
175 and  $0.91 \pm 0.07$ , respectively. Considering an expected RED value of 0.92 at the genus

176 level, these two lineages can be considered new genera in Tenericutes. The RED value  
177 for the sequences from hypersaline lake sediments was 0.70, which supports the  
178 presence of a new order or family in Tenericutes.

179

### 180 **Phylogenomic position of Tenericutes in Bacilli**

181 Tenericutes were recently integrated into the Bacilli clade within the Firmicutes  
182 phylum (15). To examine the phylogenetic positions of the new Tenericutes lineages  
183 and Bacilli, we used representative genomes of the orders within Bacilli and those in  
184 Tenericutes available on NCBI. The topology of the phylogenomic relationships was  
185 supported by two ML methods. In the phylogenomic tree, four Bacilli orders, namely  
186 Staphylococcales, Exiguobacterales, Bacillales, and Lactobacillales, were clearly split  
187 from those of Tenericutes. Newly defined orders RF39, RFN20 and ML615 in Bacilli  
188 clustered with HG1, HG2, and uncultured Tenericutes from bioreactors, respectively.  
189 This suggests that most of uncultured environmental Tenericutes are probably novel  
190 Bacilli orders, and that the boundary between Tenericutes and Bacilli is uncertain.  
191 RF39, RFN20 and ML615 were also affiliated with Tenericutes if the boundary of  
192 Tenericutes on the tree was set at Haloplasmatales. Although RF39 and RFN20 are  
193 part of the HG1 and HG2 lineages, they have also been detected in domestic animals  
194 (20). Interestingly, the Erysipelotrichales order was phylogenetically placed between  
195 both human gut lineages (Fig. 2). Since all Erysipelotrichales species described in the  
196 literature so far possess a cell wall (21), their phylogenomic affinity to cell  
197 wall-lacking Tenericutes is unexpected.

198

199 We investigated the genome structure of Tenericutes and Erysipelotrichales species by  
200 calculating genome completeness, size and GC content (Fig. S1). Most of the  
201 high-quality genomes (>90% completeness and <5% contamination) were assigned to  
202 Mycoplasmatales and Acholeplasmatales. In contrast to the rather stable genomes of  
203 the pathogenic species, the genome sizes of the uncultured Tenericutes species  
204 differed from each other and almost all were smaller than 2 Mb. Haloplasmatales  
205 genomes were the largest on average. Most of the Tenericutes genomes have a low

206 GC content (<30%), whereas the average GC content of those from a hypersaline lake  
207 was about 50%, consistent with a selection pressure exerted by ionic strength on the  
208 DNA double helix (22, 23). Notably, GC contents calculated on 1 kb intervals in  
209 *Tenericutes* genomes from ground water and HG1 (specifically RF39) varied from 20%  
210 to 70%, suggesting great plasticity and frequent gene transfers. However, these results  
211 were dependent on the number of genomes considered from different sources and may  
212 be influenced by the quality of genome binning.

213

### 214 **Genomic and functional divergence between environmental *Tenericutes* and** 215 **pathogens**

216

217 *Erysipelotrichales* and *Tenericutes* genomes were functionally annotated to  
218 characterize their metabolic pathways and stress responses that might determine the  
219 versatility and niche-specific evolution of different orders and lineages in *Tenericutes*.  
220 The annotation results against the Kyoto Encyclopedia of Genes and Genomes  
221 (KEGG) (24) and the clusters of orthologous groups (COGs) databases were used to  
222 calculate the percentages of the genes in the genomes (supplementary file 2). Based  
223 on the frequency of all the COGs, *Erysipelotrichales* and *Tenericutes* were split into  
224 two major agglomerative hierarchical clustering (AHC) clusters. *Mycoplasmatales*  
225 and *Phytoplasma* formed AHC cluster 1, while the remaining formed cluster 2.

226

227 Using Mann-Whitney test, 203 KEGG genes and 420 COGs showed a significant  
228 difference ( $p < 0.01$ ) in frequency between the two AHC clusters (supplementary file 2).  
229 We selected 62 of the genes to represent those for 16 functional categories that were  
230 distinct in environmental adaptation and carbon metabolism between the two clusters  
231 (Table S1 and Fig. 3). Sugars such as xylose, galactose and fructose might be  
232 fermented to L-lactate, formate and acetate by *Tenericutes*. The sugar sources and  
233 fermentation products differed between the groups (Fig. 3). Phosphotransferase (PTS)  
234 systems responsible for sugar cross-membrane transport were encoded by most of the  
235 genomes of *Spiroplasma*, *Mesoplasma*, *Entomoplasma*, *Haloplasmatiales*,



236 Erysipelotrichales, mycoides, and pneumoniae groups. Although most of the  
237 environmental Tenericutes genomes did not maintain PTS systems, sugar uptake  
238 might be carried out by ABC transporters. Almost all of the Tenericutes groups in the  
239 AHC cluster 2 (containing all the environmental lineages) were found to encode genes  
240 involved in starch synthesis (*glgABP*) and carbon storage, except for HG1. These  
241 Tenericutes groups also encoded the pullulanase gene *PulA* involved in starch  
242 degradation. Autotrophic pathways were present almost exclusively in environmental  
243 Tenericutes genomes. CO<sub>2</sub> is fixed by two autotrophic steps mediated by the citrate  
244 lyase genes that function in reductive citric acid cycle (rTCA) and the  
245 2-oxoglutarate/2-oxoacid ferredoxin oxidoreductase genes (*korABCD*) that encode  
246 enzymes for reductive acetyl-CoA pathway. The resulting pyruvate might be further  
247 stored as glucose and glycan via reversible Embden–Meyerhof–Parnas (EMP)  
248 pathway. PPK is the key enzyme that controls the interconversion of  
249 phosphoenolpyruvate and pyruvate in prokaryotes (25). Among all the environmental  
250 lineages and Erysipelotrichales, *ppk* gene was frequently identified (73.8%-100%)  
251 except for Haloplasmatales and Acholeplasmatales.

252

253 Aromatic biosynthesis pathway was lost in Mycoplasmatales, indicating their  
254 complete dependence on hosts for aromatic amino acids. Acquisition of amino acids  
255 by some environmental Tenericutes was likely conducted by peptidases (*pepD2*) and  
256 cross-membrane oligopeptide transporters. Glycine was also probably an important  
257 carbon and nitrogen source for the environmental Tenericutes, as a high percentage of  
258 their genomes (76.3%-100%) contained the glycine cleavage genes *gcvT* and *gcvH*.

259

260 Glycerol is a key intermediate between sugar and lipid metabolisms and is imported  
261 by a facilitation factor *GlpF*. Phosphorylation of glycerol by a glycerol kinase (GK) is  
262 followed by oxidation to dihydroxyacetone phosphate (DHAP) by  
263 glycerol-3-phosphate (G3P) dehydrogenase (*GlpD*), which is further metabolized in  
264 the glycolysis pathway (26). More than 95% of the genomes of *Mesoplasma*,  
265 pneumoniae, mycoides and wastewater groups contained the *glpD* gene; in contrast,

266 *Phytoplasma* and *Ureaplasma* genomes lacked a *glpD* gene. 62% of RFN20 genomes  
267 harbored the *glpD* gene, while it was only found in 2% of RF39. RF39 genomes also  
268 lacked the GK-encoding gene, which suggests that RF39 cannot utilize glycerol from  
269 diet or the gut membrane. Hydrogen peroxide (H<sub>2</sub>O<sub>2</sub>) is a by-product of G3P  
270 oxidation, and has deleterious effects on epithelial surfaces in humans and animals  
271 (27). On the other hand, these H<sub>2</sub>O<sub>2</sub> catabolism genes were more frequently identified  
272 in uncultured environmental Tenericutes (Fig. 3).

273

274 The DNA mismatch repair machinery components MutS and MutL were almost  
275 entirely absent from Mycoplasmatales and *Phytoplasma* genomes. RFN20 genomes  
276 also had a low percentage of the DNA repairing genes (33.3% for *mutS* and 57.1% for  
277 *mutL*). This lack of DNA repairing genes might have generated more mutants in small  
278 asexual microbial populations capable of adapting to new environments due to  
279 Muller's ratchet effect (28).

280

281 In *Mycoplasma* species as in mitochondria, tRNA anticodon base U34 can pair with  
282 any of the four bases in codon family boxes (29). To makes this ability more efficient  
283 U34 is modified in some organisms by enzymes using a carboxylated  
284 S-adenosylmethionine. The SmtA enzyme, also known as CmoM, is a  
285 methyltransferase that adds a further methyl group to U34 modified tRNA for precise  
286 decoding of mRNA and rapid growth (30, 31). The high frequency of *smtA* gene in the  
287 environmental Tenericutes genomes indicates a capacity to regulate their growth  
288 under various conditions. OmpR is a two-component regulator tightly associated with  
289 a histidine kinase/phosphatase EnvZ for regulatory response to environmental  
290 osmolarity changes(32). Its presence in most of the environmental Tenericutes  
291 genomes (>70.4%) suggests its involvement in regulating stress responses in these  
292 organisms. The genomes of two gut lineages RFN20 and RF39 also contained a high  
293 percentage of the *ompR* gene. In contrast, almost all Mycoplasmatales and  
294 *Phytoplasma* genomes lacked the *ompR* gene.

295

296 The cell division/cell wall cluster transcriptional repressor *MraZ* can negatively  
297 regulate cell division of Tenericutes (33). The *mraZ* gene that is thus responsible for  
298 dormancy of bacteria is conserved in *Erysipelotrichales* and *Mycoplasmatales*.  
299 Further studies are needed to examine whether this gene can be targeted to control  
300 pathogenicity of the bacteria in the two orders.

301

302 The Rnf proton pump system evolved in anoxic condition and is employed by  
303 anaerobes to generate proton gradients for energy conservation (34). In  
304 single-membrane Tenericutes, proton gradients can hardly be established by the Rnf  
305 system due to the leakage of protons directly to the environment. However, this  
306 system was well preserved in genomes from Izemoplasmatales and the wastewater  
307 group. The Rnf system in these species was likely used for pumping protons out of the  
308 cell to balance cytoplasmic pH.

309

### 310 **Metabolic model of gut lineages RFN20 and RF39**

311 A recent study reported the genome features of RFN20 and RF39, the two main clades  
312 comprising uncultured Tenericutes (16). The major findings on these two lineages  
313 were their small genomes and the lack of several amino acid biosynthesis pathways.  
314 After correction for genome completeness in this study, we found that the RF39  
315 genomes were indeed significantly smaller than those of RFN20 genomes (t-test;  
316  $p=0.0012$ ). We selected four nearly complete genomes of RFN20 and RF39 for  
317 annotation and elaborated their metabolic potentials (Table 1). The genome sizes were  
318 between 1.5 Mb-1.9 Mb, smaller than those from *Sharpea azabuensis* belonging to  
319 the order Erysipelotrichales. We built a schematic metabolic map for the  
320 representative RFN20 and RF39 species on the basis of the KEGG and COG  
321 annotation results. The two lineages were predicted to be acetogens since the four  
322 genomes encoded genes for acetate production (Fig. 4). We hypothesize that sugars  
323 are imported from the environment by ABC sugar transporters, while autotrophic CO<sub>2</sub>  
324 fixation might occur via carboxylation of acetyl-CoA to pyruvate by the  
325 pyruvate:ferredoxin oxidoreductase (PFOR). Glycerol is imported and enters

326 glycerophospholipid metabolism, which results in cardiolipin biosynthesis instead of  
327 fermentation through the EMP pathway. In some pathogenic mycoplasmas, glycerol  
328 can be taken into central carbon metabolism (26), as mentioned above.  
329  
330 RFN20 and RF39 are probably mixotrophic since CO<sub>2</sub> can be fixed to pyruvate and  
331 stored as starch, while central carbon metabolism is also connected with amino acid  
332 metabolism. After uptake of oligopeptides by the App ABC transporter system, an  
333 endo-oligopeptidase encoded by *pepF* yields amino acids for protein synthesis.  
334 Glycine and serine might feed into pyruvate metabolism. The peptidoglycan  
335 biosynthesis pathway was found to be complete in all four RFN20 and RF39 genomes  
336 here considered, but two genomes, namely HG1.1 and HG2.1 (Table 1), lacked the  
337 genes encoding the enzymes for UDP-N-acetylglucosamine (UDP-NAG) synthesis.  
338 Instead, these genomes harbored all the genes required for the subsequent synthesis  
339 steps to generate extracellular peptidoglycan. *murG* and *mraY* genes, which are  
340 involved in integration of UDP-NAG and UDP-N-acetylmuramate (UDP-NAM) into  
341 the peptidoglycan unit, respectively, were identified in the four genomes. With the  
342 addition of an oligopeptide, the peptidoglycan unit is secreted into the cell surface  
343 with the assistance of bactoprenol (C55 isoprenoid alcohol) (35, 36), which is formed  
344 by condensation of eight isopentenyl-diphosphate (IPP) units and one  
345 farnesyl-diphosphate (FPP). The *uppS* gene responsible for the bactoprenol formation  
346 was identified in the four RFN20 and RF39 genomes (37). In bacteria, IPP can be  
347 synthesized by several metabolic steps. All the genomes contained the genes encoding  
348 the respective enzymes involved in the intermediate steps of IPP and dimethylallyl  
349 diphosphate (DPP) synthesis through MEP/DOXP pathway, except for *ispD* gene in  
350 one genome (Fig. 4). However, the polyprenyl synthetase gene (*ispA*), which is  
351 essential in the formation of FPP, was missing in three of the genomes. Given the loss  
352 of the *ispA* gene, the source of FPP for bactoprenol synthesis is unclear. Overall, 86.9%  
353 and 14.3% of the RF39 and RFN20 genomes contained the *mraY* gene, respectively,  
354 while 68.7% and 5.2% of the RF39 and RFN20 genomes had the *murG* gene,  
355 respectively. Therefore, most of the RFN20 genomes collected in this study lacked the

356 complete pathway for peptidoglycan synthesis. The two essential genes for  
357 peptidoglycan synthesis were only frequently detected in Tenericutes genomes from  
358 the bioreactor group (75.0% for both genes) and Erysipelotrichales genomes (80.0%  
359 and 60.0% for *mraY* and *murG*, respectively). Therefore, the capacity of  
360 peptidoglycan synthesis is possibly deteriorating in the gut lineages, as a potential  
361 adaptive strategy to the gut environment. Similarly, the *H. contractile* was reported to  
362 possess the peptidoglycan synthesis genes in its genome (4), although it also lacks a  
363 cell wall. Our further examination of the genome found that the *murEF* genes  
364 involved in extending the oligopeptide attached on UDP-NAM were absent. Hence,  
365 the synthesis of aminosugars NAG and NAM probably served as a mechanism of  
366 carbon and nitrogen storage for *H. contractile*.

367

368 RFN20 and RF39 are probably hydrogen producers, as the four genomes of HG1 and  
369 HG2 had [FeFe]-hydrogenase encoding genes. All the genomes carried the *feo* and *fhu*  
370 genes for ferrous iron uptake. Ferrous irons are taken by ABC transporters Feo into  
371 the cells when ferrous iron concentration is high in the environment. The Fhu receptor  
372 for ferrichrome absorption is required in iron-limiting condition such as the human  
373 gut (38). The oxygen-sensitive [FeFe]-hydrogenases contain 4Fe-4S cluster and an  
374 H-cluster consisting of several conserved catalytic motifs involved in hydrogen  
375 production. Three distinct binding motifs of H-cluster in [FeFe]-hydrogenases,  
376 TSCXP, PCX<sub>2</sub>KX<sub>2</sub>E and EXMXCXGGCX<sub>2</sub>C (39), were present in the five  
377 hydrogenases encoded by all the four genomes (Fig. S2). However, three of the  
378 hydrogenases from HG1 and HG2 harbor specific sites that differ from the others in  
379 some of the active sites. We have identified several orthologs with these distinct  
380 amino acids in the conserved motifs. These [FeFe]-hydrogenases formed a novel  
381 cluster in the phylogenetic tree. HG2.1 genome harbored two copies of the  
382 [FeFe]-hydrogenase genes, which were diversified as shown by their positions in the  
383 phylogenetic tree and the differences in conserved catalytic sites (Fig. S2). In the  
384 human gut, three groups of [FeFe]-hydrogenases have been detected, and were  
385 proposed to be involved in methanogenesis, acetogenesis and sulfate reduction (40).

386 Lignocellulose-feeding termites also produce a high concentration of hydrogen in  
387 their guts, probably for degradation of wood (41). Therefore, the HG1 and HG2 gut  
388 lineages are probably important for maintenance of a healthy gut microbial ecosystem  
389 and degradation of recalcitrant carbon.

390

391 As indicated by the phylogenomics tree, there is a high genomic variation within the  
392 RFN20 and RF39 lineages. Therefore, the predicted lifestyle of RFN20 and RF39  
393 may vary among human populations. For example, 68.7% and 76.2% of RF39 and  
394 RFN20 genomes, respectively, harbored the *uppS* gene for bactoprenol synthesis.  
395 However, the lack of high-quality, isolate genomes representing these lineages hinders  
396 the evaluation of their dynamics and evolutionary processes in the human gut.

397

398 In this study, the genomic features of RFN20 and RF39 were shown to be highly  
399 dynamic among genomes from different sources. RF39 genomes lacked most of the  
400 genes for carbohydrate storage but maintained *mutSL* genes involved in DNA repair  
401 (Fig. 3). Except for this, there were no major differences between the two lineages,  
402 although a previous study claimed that RF39 were prone to be autotrophic (16). In  
403 deep-sea isopod gut, we also identified two types of Tenericutes bacteria, *Mycoplasma*  
404 sp. Bg1 and Bg2 (6). *M. sp. Bg1* was able to degrade sialic acids probably by  
405 attachment to the host gut surface. The co-existence of two Tenericutes lineages in  
406 human and animal intestinal tracts is still enigmatic and warrants further  
407 investigations using microscopy and transcriptomics methods.

408

409 In conclusion, our study revealed phylogenetic diversity of the Tenericutes groups and  
410 their phylogenomic relationships with Bacilli. In the environmental groups of  
411 Tenericutes, we uncovered novel lineages in human guts and marine environments,  
412 indicating the lack of environmental representatives for studies on their adaptive  
413 strategies and pathogenicity. Our finding of the gut lineages and their metabolic  
414 characteristics casts lights into unknown diversified mutualistic Tenericutes in gut  
415 microbiome.

416

## 417 **MATERIAL AND METHODS**

### 418 **Genome collection and quality check**

419 A total of 857 *Tenericutes* genomes were downloaded from the NCBI database. Three  
420 genomes of deep-sea symbiotic *Tenericutes* were collected from the previous studies  
421 (6, 7). Completeness and contamination of the genomes were evaluated by CheckM  
422 (v1.0.5) (42). Those with >10% contaminants and <50% complete were removed. To  
423 explore variations of GC content in these genomes, GC content within 1-kb genome  
424 intervals were calculated. 16S rRNA genes were identified from these genomes using  
425 rRNA\_HMM with default settings (43), and only those longer than 300 bp were  
426 extracted. If there was more than one 16S rRNA gene in a genome, the longest one  
427 was selected. The sequences were grouped with an identity cutoff of 99% using  
428 CD-HIT (44) and only the longest was retained as the representative. From each order  
429 of Bacilli, five genomes (see supplementary file 1) were obtained from the Genome  
430 Tree Database (GTDB) (15). They were selected from different families if possible.

431

### 432 **Genome annotation and comparison**

433 The protein coding sequences in the genomes were predicted by Prodigal (v2.6.2) (45)  
434 (proteins from *Tenericutes* in particular were predicted with parameter `-g 4`). The  
435 proteins were then searched against the eggNOG database by eggNOG-mapper (v2)  
436 (46) (with parameters `--seed_ortholog_evalue 1e-10`), KEGG (24) and COGs (47)  
437 databases by Blastp with E-value cutoff of 1e-05 and similarity threshold of 40%. The  
438 functions of essential COGs belonging to *Tenericutes* were referred to those for a  
439 synthetic bacterium JCVI-Syn3.0 with a minimal genome (48).

440

441 The collected *Tenericutes* genomes were grouped by taxonomy and source  
442 (supplementary file 1). The percentage of the KEGG genes and COGs in the genomes  
443 of each group was calculated. This was also accomplished for *Erysipelotrichales*  
444 genomes. To filter low-frequency genes, at least one of the groups had a target gene  
445 in >30% of the genomes. The percentages of the genes used for Bray-Curtis

446 dissimilarity estimates were calculated using the COG frequency table. AHC analysis  
447 was conducted using the pairwise dissimilarities between groups. A Mann-Whitney  
448 test was performed using the percentages of COGs and KEGG genes between the  
449 AHC clusters. The KEGG genes with  $p$  value  $<0.01$  were clustered into functional  
450 modules on the KEGG website ([www.kegg.jp](http://www.kegg.jp)).

451

#### 452 **Phylogenetic and phylogenomic analyses**

453 The analyses on the datasets of 16S rRNA gene amplicons from marine samples were  
454 described in our previous study (49). The representative reads of Tenericutes OTUs  
455 were recruited for this study. Raw metagenomic data from Tara Ocean project were  
456 checked by FastQC (version 0.11.4). Reads with low quality bases (PHRED quality  
457 score  $< 20$  over 70% of the reads) were removed using the NGS QC Toolkit (50). The  
458 quality-filtered reads were merged using PEAR (v0.9.5) (51) and those 16S rRNA  
459 fragments  $>140$  bp were identified and extracted with rRNA\_HMM (43). After  
460 taxonomic classification of the fragments using the Ribosomal Database Project (RDP)  
461 classifier version 2.2 against the SILVA 128 database (52, 53), those belonging to  
462 Tenericutes were collected for the following phylogenetic study.

463

464 The 16S rRNA genes from the genomes, the amplicons and the Tara project were first  
465 clustered by MUSCLE (v3.8) (54) and then trimmed by trimAl v1.4 (automated1)  
466 (55). The ML phylogenetic tree of 16S rRNA genes was built by IQ-TREE (v1.6.10)  
467 (56, 57) (with parameters  $-m$  GTR+F+R10  $-alrt$  1000  $-bb$  1000). Conserved proteins  
468 of the Tenericutes genomes were identified by AMPHORA2 (58). A total of 31  
469 conserved proteins were used to construct the phylogenomic tree for Tenericutes. The  
470 conserved proteins were aligned with MUSCLE (v3.8)(54), concatenated and then  
471 trimmed with trimAl (v1.4) (automated1) (55). The conserved proteins from  
472 *Syntrophomonas wolfei* (NC\_008346), *Thermacetogenium phaeum* (NC\_018870) and  
473 *Desulfallas geothermicus* (NZ\_FOYM01000001) were combined with the dataset of  
474 Tenericutes as an outgroup. The phylogenomics tree for Tenericutes was built by  
475 IQ-TREE (v1.6.10) (56, 57) (with parameters  $-m$  LG+F+R10  $-alrt$  1000  $-bb$  1000).



476 The phylogenomic tree for Bacilli and Tenericutes was constructed first with  
477 IQ-TREE (v1.6.10) using the same settings as that for the phylogenomics tree of  
478 Tenericutes and then with RAxML 8.1.21 using PROTGAMMA+BLOSUM62 model  
479 with 100 bootstrap replicates.

480

#### 481 **Prediction of metabolic models of RFN20 and RF39**

482 Four genomes were selected from the downloaded genomes of Tenericutes to  
483 represent RFN20 and RF39 with respect to their high genome completeness. The  
484 protein-coding sequences were predicted by Prodigal (v2.6.2) (45) as mentioned  
485 above. The proteins were then searched against COG database (47) by Blastp (59)  
486 with an E-value cutoff of 1e-05. KEGG annotation was conducted using the online  
487 BlastKOALA tool (24).

488

#### 489 **ACKNOWLEDGEMENTS:**

490 This study was supported by the National Key Research and Development Program of  
491 China (2016YFC0302504 and 2018YFC0310005). AA and RDF are supported by  
492 European Molecular Biology Laboratory core funds. We thank Shriya Raj for  
493 comments and feedback on the manuscript.

494 Y.W., A.D. and L.S.H. designed the study; Y.W., J.M.H., and Y.L.Z. performed the  
495 bulk of the phylogenomic analyses; A.A. and R.D.F. contributed data for analysis;  
496 Y.W. wrote the manuscript. All of us contributed to manuscript revisions.

497 The authors declare that there is no conflict of interest.

#### 498 **REFERENCES:**

- 499 1. **Razin S, Herrmann R.** 2002. Molecular biology and pathogenicity of mycoplasmas. Springer,  
500 Boston, MA.
- 501 2. **Antunes A, Rainey FA, Wanner G, Taborda M, Pätzold J, Nobre MF, da Costa MS,**  
502 **Huber R.** 2008. A new lineage of halophilic, wall-less, contractile bacteria from a brine-filled  
503 deep of the Red Sea. *J Bacteriol* **190**:3580-3587.
- 504 3. **Skennerton CT, Haroon MF, Briegel A, Shi J, Jensen GJ, Tyson GW, Orphan VJ.** 2016.  
505 Phylogenomic analysis of Candidatus ‘Izimaplasma’ species: free-living representatives from  
506 a Tenericutes clade found in methane seeps. *ISME J* **10**:2679-2692.
- 507 4. **Antunes A, Alam I, El Dorry H, Siam R, Robertson A, Bajic VB, Stingl U.** 2011. Genome

- 508 sequence of Haloplasma contractile, an unusual contractile bacterium from a deep-sea anoxic  
509 brine lake. J Bacteriol **193**:4551-4552.
- 510 5. **Wang YJ, Stingl U, Anton-Erxleben F, Geisler S, Brune A, Zimmer M.** 2004. "*Candidatus*  
511 *Hepatoplasma crinochetorum*," a new, stalk-forming lineage of Mollicutes colonizing the  
512 midgut glands of a terrestrial isopod. Appl Environ Microb **70**:6166-6172.
- 513 6. **Wang Y, Huang JM, Wang SL, Gao ZM, Zhang AQ, Danchin A, He LS.** 2016. Genomic  
514 characterization of symbiotic mycoplasmas from the stomach of deep-sea isopod bathynomus  
515 sp. Environ Microbiol **18**:2646-2659.
- 516 7. **He L-S, Zhang P-W, Huang J-M, Zhu F-C, Danchin A, Wang Y.** 2018. The enigmatic  
517 genome of an obligate ancient Spiroplasma symbiont in a hadal holothurian. Appl Environ  
518 Microbiol **84**:e01965-01917.
- 519 8. **Sullam KE, Essinger SD, Lozupone CA, O'Connor MP, Rosen GL, Knight R, Kilham SS,**  
520 **Russell JA.** 2012. Environmental and ecological factors that shape the gut bacterial  
521 communities of fish: a meta-analysis. Mol Ecol **21**:3363-3378.
- 522 9. **Yun JH, Roh SW, Whon TW, Jung MJ, Kim MS, Park DS, Yoon C, Nam YD, Kim YJ,**  
523 **Choi JH, Kim JY, Shin NR, Kim SH, Lee WJ, Bae JW.** 2014. Insect gut bacterial diversity  
524 determined by environmental habitat, diet, developmental stage, and phylogeny of host. Appl  
525 Environ Microbiol **80**:5254-5264.
- 526 10. **Aceves AK, Johnson P, Bullard SA, Lafrentz S, Arias CR.** 2018. Description and  
527 characterization of the digestive gland microbiome in the freshwater mussel *Villosa nebulosa*  
528 (*Bivalvia*: *Unionidae*). J Molluscan Studies **84**:240-246.
- 529 11. **Almeida A, Mitchell AL, Boland M, Forster SC, Gloor GB, Tarkowska A, Lawley TD,**  
530 **Finn RD.** 2019. A new genomic blueprint of the human gut microbiota. Nature **568**:499-504.
- 531 12. **Moran NA.** 2002. Microbial minimalism: Genome reduction in bacterial pathogens. Cell  
532 **108**:583-586.
- 533 13. **Lo W-S, Gasparich GE, Kuo C-H.** 2018. Convergent evolution among ruminant-pathogenic  
534 mycoplasma involved extensive gene content changes. Genome Biol Evol **10**:2130-2139.
- 535 14. **Chernov VM, Chernova OA, Mouzykantov AA, Medvedeva ES, Baranova NB, Malygina**  
536 **TY, Aminov RI, Trushin MV.** 2018. Antimicrobial resistance in mollicutes: known and  
537 newly emerging mechanisms. FEMS Microbiol Lett **365**.
- 538 15. **Parks DH, Chuvochina M, Waite DW, Rinke C, Skarshewski A, Chaumeil PA,**  
539 **Hugenholtz P.** 2018. A standardized bacterial taxonomy based on genome phylogeny  
540 substantially revises the tree of life. Nature Biotechnol **36**:996-1004.
- 541 16. **Nayfach S, Shi ZJ, Seshadri R, Pollard KS, Kyrpides NC.** 2019. New insights from  
542 uncultivated genomes of the global human gut microbiome. Nature **568**:505-510.
- 543 17. **Zhang LT, Huang XF, Xue B, Peng QH, Wang ZS, Yan TH, Wang LZ.** 2015.  
544 Immunization against rumen methanogenesis by vaccination with a new recombinant protein.  
545 PLoS ONE **10**:e0140086.
- 546 18. **Cheng X-Y, Wang Y, Li J-Y, Yan G-Y, He L-S.** 2019. Comparative analysis of the gut  
547 microbial communities between two dominant amphipods from the Challenger Deep, Mariana  
548 Trench. Deep Sea Res I **151**:103081.
- 549 19. **Sunagawa S, Coelho LP, Chaffron S, Kultima JR, Labadie K, Salazar G, Djahanschiri B,**  
550 **Zeller G, Mende DR, Alberti A, Cornejo-Castillo FM, Costea PI, Cruaud C, d'Ovidio F,**  
551 **Engelen S, Ferrera I, Gasol JM, Guidi L, Hildebrand F, Kokoszka F, Lepoivre C,**

- 552 **Lima-Mendez G, Poulain J, Poulos BT, Royo-Llonch M, Sarmento H, Vieira-Silva S,**  
553 **Dimier C, Picheral M, Searson S, Kandels-Lewis S, Bowler C, de Vargas C, Gorsky G,**  
554 **Grimsley N, Hingamp P, Iudicone D, Jaillon O, Not F, Ogata H, Pesant S, Speich S,**  
555 **Stemmann L, Sullivan MB, Weissenbach J, Wincker P, Karsenti E, Raes J, Acinas SG,**  
556 **Bork P.** 2015. Structure and function of the global ocean microbiome. *Science* **348**:1261359.
- 557 20. **Pitta DW, Parmar N, Patel AK, Indugu N, Kumar S, Prajapathi KB, Patel AB, Reddy B,**  
558 **Joshi C.** 2014. Bacterial diversity dynamics associated with different diets and different  
559 primer pairs in the rumen of kankrej cattle. *PLoS ONE* **9**:e111710.
- 560 21. **Shimoji Y, Yokomizo Y, Sekizaki T, Mori Y, Kubo M.** 1994. Presence of a capsule in  
561 *Erysipelothrix-Rhusiopathiae* and its relationship to virulence for mice. *Infect Imm*  
562 **62**:2806-2810.
- 563 22. **Soppa J.** 2006. From genomes to function: haloarchaea as model organisms. *Microbiology*  
564 **152**:585-590.
- 565 23. **Lyubchenko YL, Shlyakhtenko LS.** 1997. Visualization of supercoiled DNA with atomic  
566 force microscopy in situ. *Proc Natl Acad Sci U S A* **94**:496-501.
- 567 24. **Kanehisa M, Goto S.** 2000. KEGG: kyoto encyclopedia of genes and genomes. *Nucl Acids*  
568 *Res* **28**:27-30.
- 569 25. **Tjaden B, Plagens A, Dorr C, Siebers B, Hensel R.** 2006. Phosphoenolpyruvate synthetase  
570 and pyruvate, phosphate dikinase of *Thermoproteus tenax*: key pieces in the puzzle of archaeal  
571 carbohydrate metabolism. *Mol Microbiol* **60**:287-298.
- 572 26. **Yeh JI, Chinte U, Du S.** 2008. Structure of glycerol-3-phosphate dehydrogenase, an essential  
573 monotopic membrane enzyme involved in respiration and metabolism. *Proc Natl Acad Sci U S*  
574 *A* **105**:3280-3285.
- 575 27. **Blotz C, Stulke J.** 2017. Glycerol metabolism and its implication in virulence in *Mycoplasma*.  
576 *FEMS Microbiol Rev* **41**:640-652.
- 577 28. **Andersson DI, Hughes D.** 1996. Muller's ratchet decreases fitness of a DNA-based microbe.  
578 *Proc Natl Acad Sci U S A* **93**:906-907.
- 579 29. **Grosjean H, Westhof E.** 2016. An integrated, structure- and energy-based view of the genetic  
580 code. *Nucl Acids Res* **44**:8020-8040.
- 581 30. **Sakai Y, Miyauchi K, Kimura S, Suzuki T.** 2016. Biogenesis and growth phase-dependent  
582 alteration of 5-methoxycarbonylmethoxyuridine in tRNA anticodons. *Nucl Acids Res*  
583 **44**:509-523.
- 584 31. **Yamanaka K, Ogura T, Niki H, Hiraga S.** 1995. Characterization of the *smtA* gene encoding  
585 an S-adenosylmethionine-dependent methyltransferase of *Escherichia coli*. *FEMS Microbiol*  
586 *Lett* **133**:59-63.
- 587 32. **Cai SJ, Inouye M.** 2002. EnvZ-OmpR interaction and osmoregulation in *Escherichia coli*. *J*  
588 *Biol Chem* **277**:24155-24161.
- 589 33. **Eraso JM, Markillie LM, Mitchell HD, Taylor RC, Orr G, Margolin W.** 2014. The highly  
590 conserved MraZ protein is a transcriptional regulator in *Escherichia coli*. *J Bacteriol*  
591 **196**:2053-2066.
- 592 34. **Schuchmann K, Muller V.** 2014. Autotrophy at the thermodynamic limit of life: a model for  
593 energy conservation in acetogenic bacteria. *Nat Rev Microbiol* **12**:809-821.
- 594 35. **Thorne KJ, Kodicek E.** 1966. The structure of bactoprenol, a lipid formed by lactobacilli  
595 from mevalonic acid. *Biochem J* **99**:123-127.

- 596 36. **Manat G, Roure S, Auger R, Bouhss A, Barreteau H, Mengin-Lecreulx D, Touzé T.** 2014.  
597 Deciphering the metabolism of undecaprenyl-phosphate: the bacterial cell-wall unit carrier at  
598 the membrane frontier. *Microb Drug Res* **20**:199-214.
- 599 37. **Mostafavi AZ, Lujan DK, Erickson KM, Martinez CD, Troutman JM.** 2013. Fluorescent  
600 probes for investigation of isoprenoid configuration and size discrimination by  
601 bactoprenol-utilizing enzymes. *Bioorganic Med Chem* **21**:5428-5435.
- 602 38. **Wooldridge KG, Williams PH.** 1993. Iron uptake mechanisms of pathogenic bacteria. *FEMS*  
603 *Microbiol Rev* **12**:325-348.
- 604 39. **Mulder David W, Shepard Eric M, Meuser Jonathan E, Joshi N, King Paul W, Posewitz**  
605 **Matthew C, Broderick Joan B, Peters John W.** 2011. Insights into [FeFe]-hydrogenase  
606 structure, mechanism, and maturation. *Structure* **19**:1038-1052.
- 607 40. **Wolf PG, Biswas A, Morales SE, Greening C, Gaskins HR.** 2016. H-2 metabolism is  
608 widespread and diverse among human colonic microbes. *Gut Microbes* **7**:235-245.
- 609 41. **Ballor NR, Leadbetter JR.** 2012. Patterns of [FeFe] hydrogenase diversity in the gut  
610 microbial communities of lignocellulose-feeding higher termites. *Appl Environ Microb*  
611 **78**:5368-5374.
- 612 42. **Parks DH, Imelfort M, Skennerton CT, Hugenholtz P, Tyson GW.** 2015. CheckM:  
613 assessing the quality of microbial genomes recovered from isolates, single cells, and  
614 metagenomes. *Genome Res* **25**:1043-1055.
- 615 43. **Huang Y, Gilna P, Li W.** 2009. Identification of ribosomal RNA genes in metagenomic  
616 fragments. *Bioinformatics* **25**:1338-1340.
- 617 44. **Fu LM, Niu BF, Zhu ZW, Wu ST, Li WZ.** 2012. CD-HIT: accelerated for clustering the  
618 next-generation sequencing data. *Bioinformatics* **28**:3150-3152.
- 619 45. **Hyatt D, Locascio PF, Hauser LJ, Uberbacher EC.** 2012. Gene and translation initiation  
620 site prediction in metagenomic sequences. *Bioinformatics* **28**:2223-2230.
- 621 46. **Huerta-Cepas J, Forslund K, Coelho LP, Szklarczyk D, Jensen LJ, Von MC, Bork P.**  
622 2016. Fast genome-wide functional annotation through orthology assignment by  
623 eggNOG-mapper. *Mol Biol Evol* **34**:2115.
- 624 47. **Galperin MY, Makarova KS, Wolf YI, Koonin EV.** 2015. Expanded microbial genome  
625 coverage and improved protein family annotation in the COG database. *Nucl Acids Res*  
626 **43**:261-269.
- 627 48. **Hutchison CA, 3rd, Chuang RY, Noskov VN, Assad-Garcia N, Deerinck TJ, Ellisman**  
628 **MH, Gill J, Kannan K, Karas BJ, Ma L, Pelletier JF, Qi ZQ, Richter RA, Strychalski EA,**  
629 **Sun L, Suzuki Y, Tsvetanova B, Wise KS, Smith HO, Glass JI, Merryman C, Gibson DG,**  
630 **Venter JC.** 2016. Design and synthesis of a minimal bacterial genome. *Science* **351**:aad6253.
- 631 49. **Li W-L, Huang J-M, Zhang P-W, Cui G-J, Wei Z-F, Wu Y-Z, Gao Z-M, Han Z, Wang Y.**  
632 2019. Periodic and spatial spreading of alkanes and *Alcanivorax* bacteria in deep waters of the  
633 Mariana Trench. *Appl Environ Microbiol* **85**:e02089-02018.
- 634 50. **Patel RK, Jain M.** 2012. NGS QC toolkit: A toolkit for quality control of next generation  
635 sequencing data. *PLoS ONE* **7**:e30619.
- 636 51. **Zhang J, Kobert K, Flouri T, Stamatakis A.** 2014. PEAR: a fast and accurate Illumina  
637 Paired-End reAd mergeR. *Bioinformatics* **30**:614.
- 638 52. **Caporaso JG, Bittinger K, Bushman FD, Desantis TZ, Andersen GL, Knight R.** 2010.  
639 PyNAST: a flexible tool for aligning sequences to a template alignment. *Bioinformatics*

- 640           **26**:266-267.
- 641 53.   **Wang Q, Garrity GM, Tiedje JM, Cole JR.** 2007. Naïve Bayesian Classifier for Rapid  
642           Assignment of rRNA Sequences into the New Bacterial Taxonomy. *Appl Environ Microbiol*  
643           **73**:5261.
- 644 54.   **Edgar RC.** 2004. MUSCLE: multiple sequence alignment with high accuracy and high  
645           throughput. *Nucl Acids Res* **32**:1792-1797.
- 646 55.   **Capellagutiérrez S, Sillamartínez JM, Gabaldón T.** 2009. trimAl: a tool for automated  
647           alignment trimming in large-scale phylogenetic analyses. *Bioinformatics* **25**:1972-1973.
- 648 56.   **Lam-Tung N, Schmidt HA, Arndt VH, Bui Quang M.** 2015. IQ-TREE: a fast and effective  
649           stochastic algorithm for estimating maximum-likelihood phylogenies. *Mol Biol Evol*  
650           **32**:268-274.
- 651 57.   **Kalyaanamoorthy S, Minh BQ, Wong TKF, Haeseler AV, Jermiin LS.** 2017. ModelFinder:  
652           fast model selection for accurate phylogenetic estimates. *Nature Meth* **14**: 587-589.
- 653 58.   **Wu M, Scott AJ.** 2012. Phylogenomic analysis of bacterial and archaeal sequences with  
654           AMPHORA2. *Bioinformatics* **28**:1033-1034.
- 655 59.   **Altschul SE, Gish W, Miller W, Myers EW, Lipman DJ.** 1990. Basic local alignment search  
656           tool. *J Mol Biol* **215**:403-410.

657

658 Table 1. Representative genomes of RFN20 and RF39.

659 RF39 (HG1) was represented by HG1.1 and HG1.2 from the *Tenericutes* downloaded  
660 from NCBI; RFN20 (HG2) was represented by HG2.1 and HG2.2. *S. azabuensis* was a  
661 species in *Erysipetrichales*.

662

| ID               | HG1.1     | HG1.2     | HG2.1     | HG2.2     | <i>Sharpea azabuensis</i> |
|------------------|-----------|-----------|-----------|-----------|---------------------------|
|                  | UQAI0100  | UQAG010   | UPZX010   | UQBB010   | JNKU00000                 |
| Accession        | 0000      | 00000     | 00000     | 00000     | 000                       |
| Genome size (bp) | 1,690,546 | 1,911,898 | 1,525,481 | 1,699,832 | 2,411,783                 |
| %GC              | 30        | 29.5      | 30.1      | 30.4      | 37.1                      |
| No.contigs       | 109       | 71        | 31        | 16        | 94                        |
| %Complete        | 98.7      | 98.7      | 98.9      | 98.5      | 99.1                      |
| %Contaminant     | 0         | 0         | 0         | 0         | 0.9                       |
| No. tRNA         | 38        | 35        | 34        | 45        | 57                        |
| No. rRNA         | 0         | 2         | 1         | 0         | 10                        |
| %Coding density  | 92        | 90.8      | 92.5      | 91.6      | 89                        |
| No. CDSs         | 1,548     | 1,834     | 1,488     | 1,570     | 2,424                     |

663

664 Figure 1. Phylogenetic trees of *Tenericutes*

665 The maximum-likelihood phylogenetic trees were constructed by concatenated  
666 conserved proteins (A) and 16S rRNA genes (B). The bootstrap values (>50) are

667 denoted by the dots on the branches.

668

669 Figure 2. Phylogenetic positions of Tenericutes families in Bacilli.

670 Representative genomes from orders of Bacilli were used to construct the  
671 phylogenomics tree using concatenated conserved proteins by IQ-TREE and RAxML.  
672 The bootstrap values were shown as triangles (50-90) and dots (>90) with a red color  
673 for the results of RAxML and deep blue for those of IQ-TREE, respectively. The  
674 purple clades represent the orders of Bacilli and the red ones denote Tenericutes.

675

676 Figure 3. Distribution of genes and pathways in the Tenericutes lineages.

677 Tenericutes lineages were grouped using an agglomerative hierarchical clustering on  
678 the basis of the distribution of COGs within each group. The color and size of each  
679 dot represent the percentage of genomes within each lineage that carries the gene. The  
680 functions of these genes are shown in Table S1.

681

682 Figure 4. Schematic metabolism of RFN20 and RF39

683 Metabolic models predicted by using gene annotation results of four representative  
684 genomes of RFN20 and RF39 (see Table 1). Solid squares indicate presence of the  
685 genes responsible for a step or a pathway. The products depicted in the MEP/DOXP  
686 pathway are 1-deoxy-xylulose 5-P, 2-C-methyl-D-erythritol 4-P, 4-(Cytidine  
687 5'-PP)-2-C-methyl-erythritol, 2-P-4-(cytidine 5'-PP)-2-C-methyl-erythritol,  
688 2-C-methyl-erythritol 2,4-PP, 1-hydroxy-2-methyl-2-butenyl 4-PP, dimethylallyl-PP,  
689 isopentenyl-PP, and farnesyl-PP.

690

691

692

693

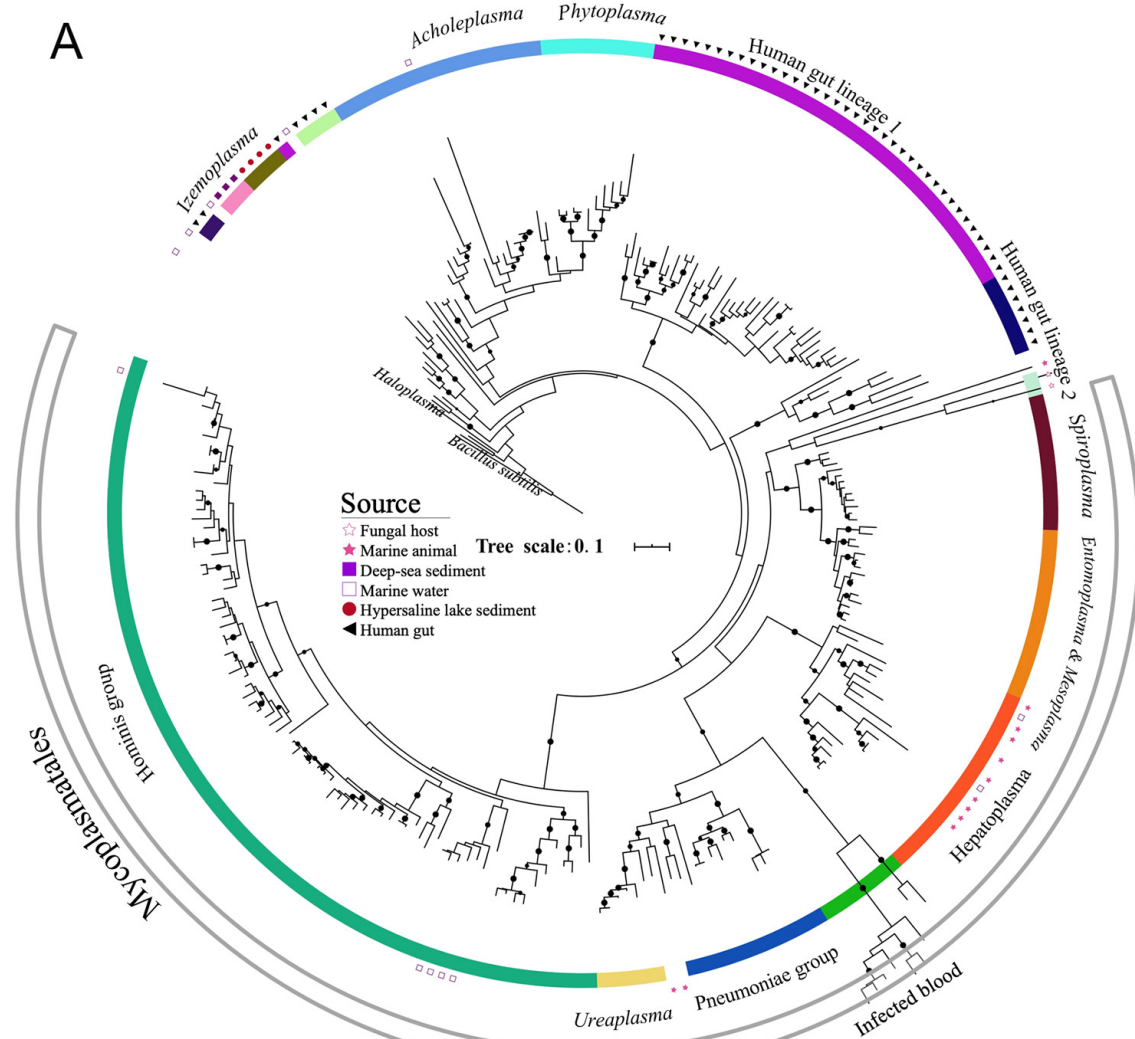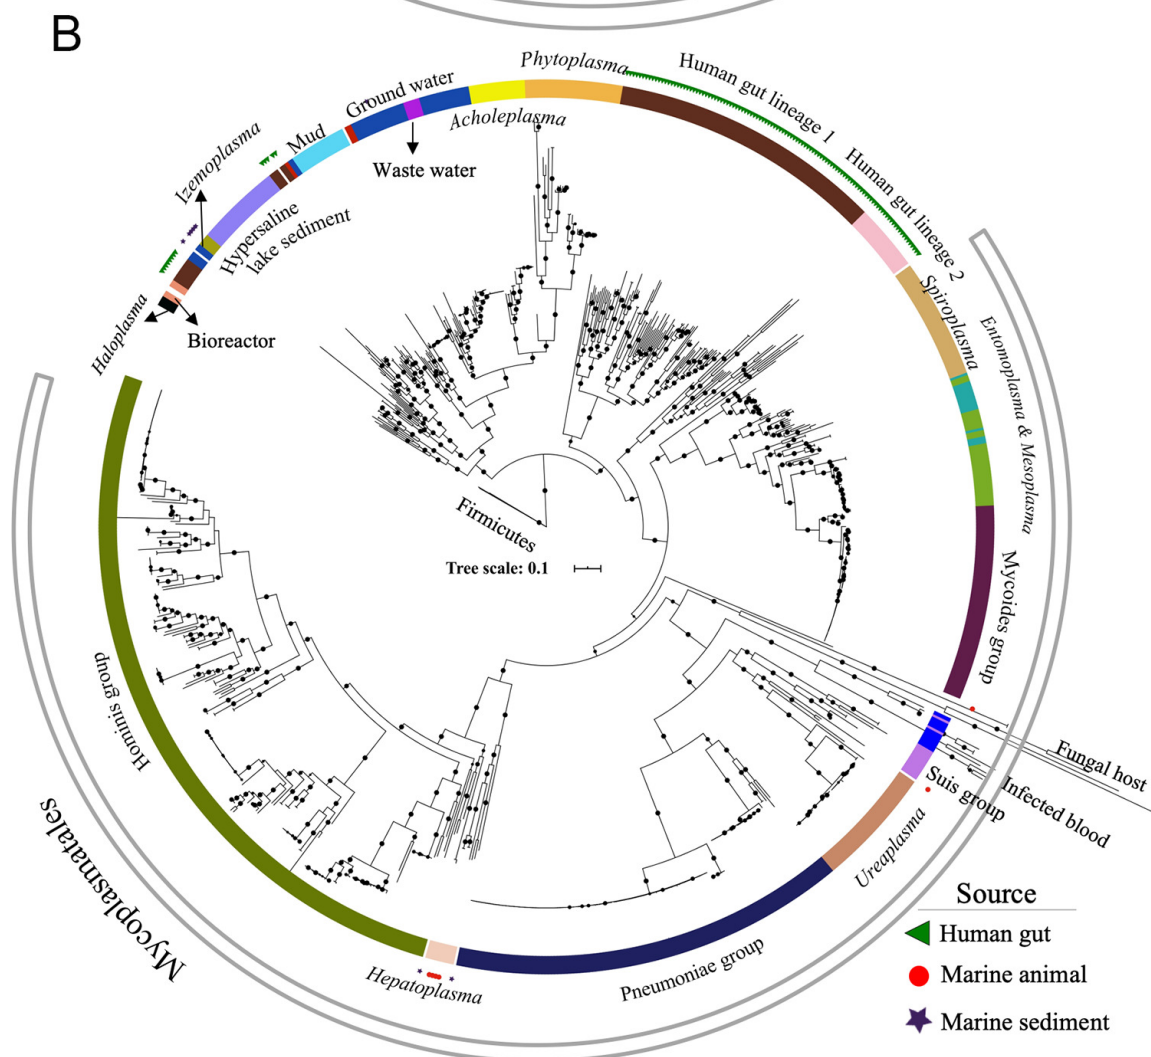

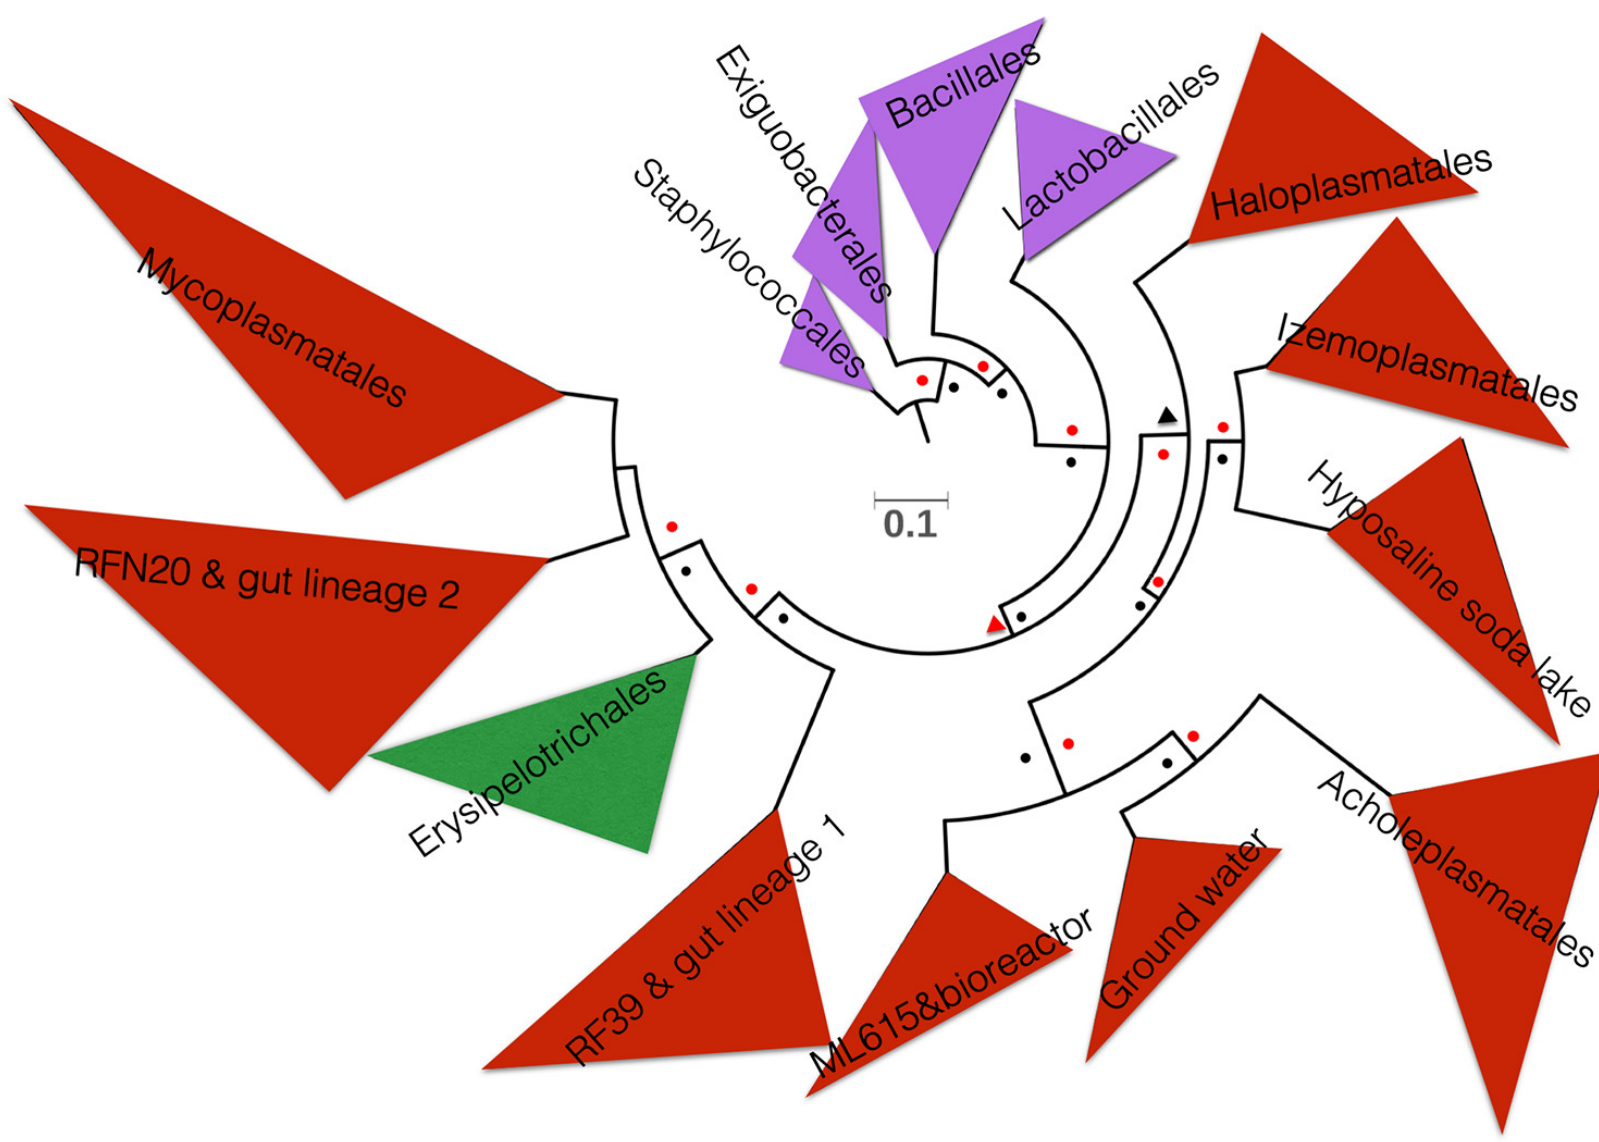



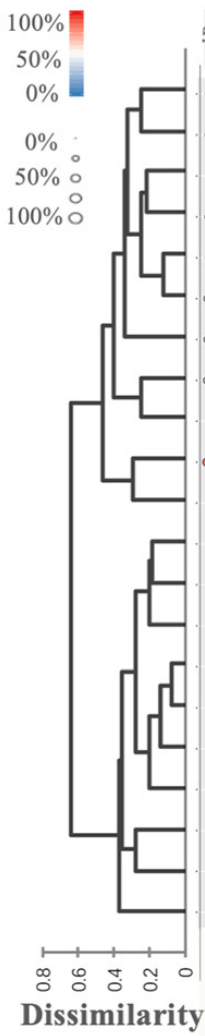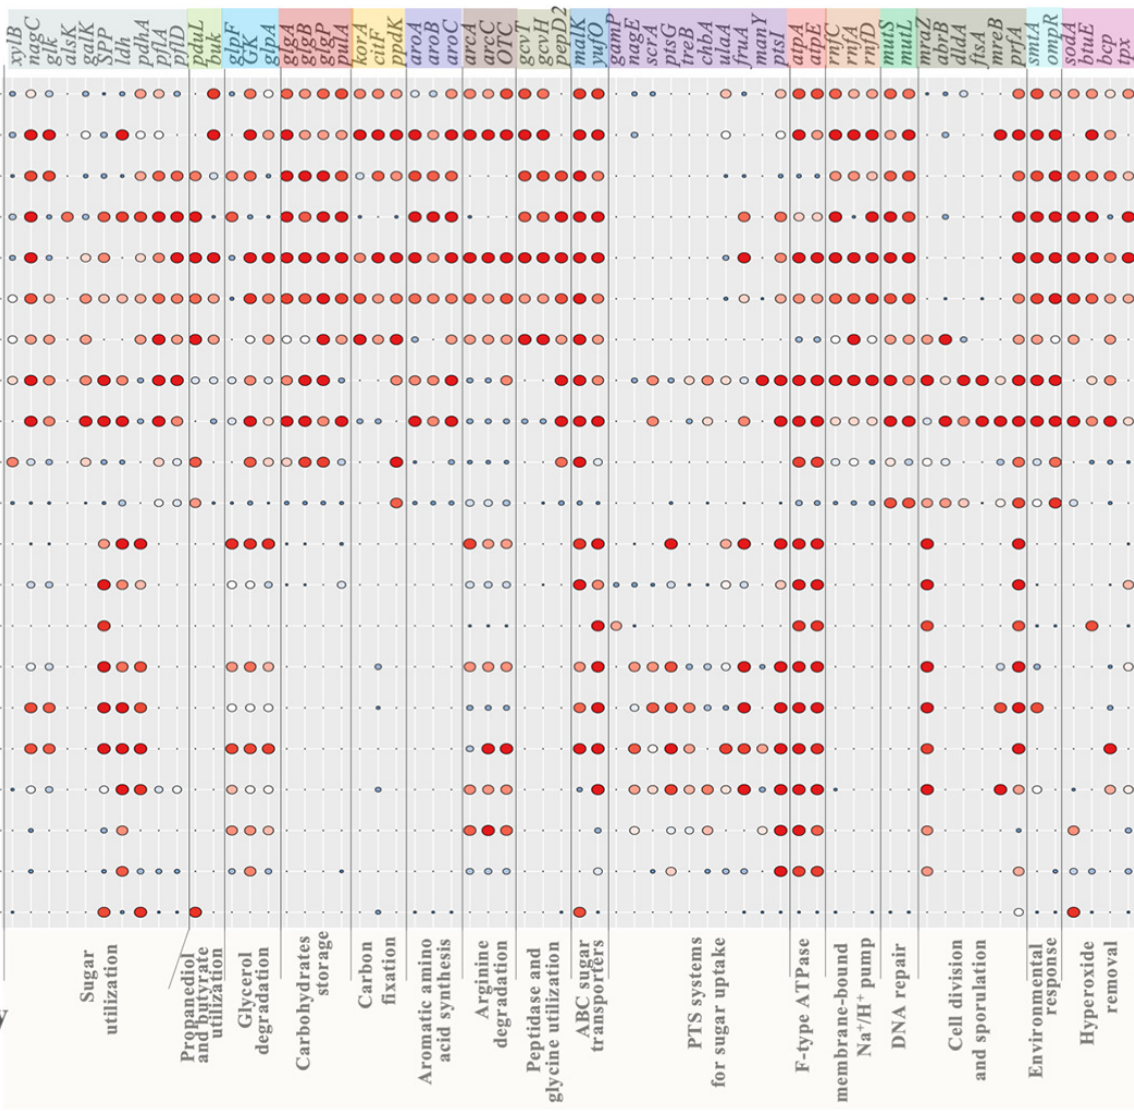

Mycoplasmatales

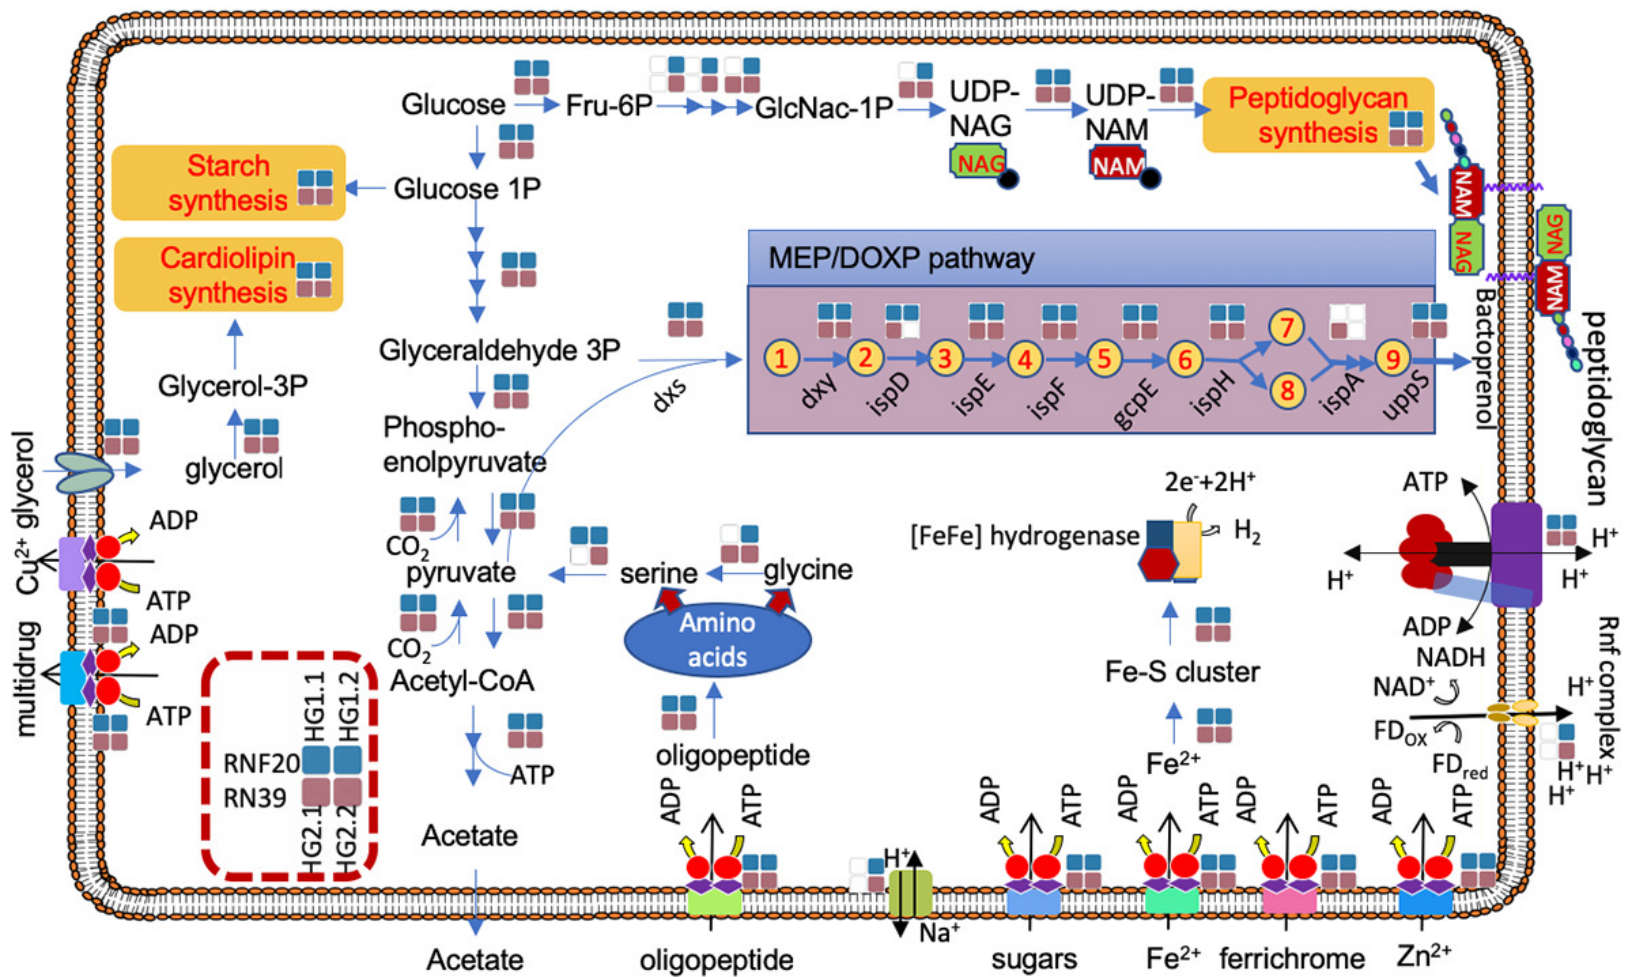

Source: http://biorxiv.org/content/10.1101/2020.01.21.914887v1.full.pdf
